# Supplementary material
Source: publisher site journal article supplement (https://www.dovepress.com/article/559427)
Supplement: Supplementary file 1 [file 559427%20Revised%20supplementary%20tables.docx]

**Supplementary Table 1.** Demographic and professional characteristics of 15 experts

| **No.** | **Specialty/Field** | **Age (years)** | **Education** | **Years of experience** | **Title** | **Hospital level** |
| --- | --- | --- | --- | --- | --- | --- |
| 1 | Clinical medicine | 40 | Bachelor | 21 | Senior | Tertiary A |
| 2 | Nursing management | 39 | Bachelor | 20 | Senior | Tertiary A |
| 3 | Clinical nursing practice | 39 | Bachelor | 20 | Intermediate | Tertiary A |
| 4 | Clinical nursing practice | 33 | Master | 10 | Intermediate | Tertiary A |
| 5 | Clinical medicine | 34 | Master | 11 | Intermediate | Tertiary A |
| 6 | Clinical nursing practice | 33 | Bachelor | 15 | Intermediate | Tertiary A |
| 7 | Clinical nursing practice | 35 | Bachelor | 13 | Intermediate | Tertiary A |
| 8 | Nursing education | 53 | Master | 28 | Associate Professor | Tertiary A |
| 9 | Nursing education | 53 | Master | 29 | Associate Professor | Tertiary A |
| 10 | Nursing education | 39 | Master | 14 | Associate Professor | Tertiary A |
| 11 | Clinical medicine | 34 | Master | 12 | Intermediate | Tertiary A |
| 12 | Omaha System research expert | 54 | Master | 36 | Senior | Tertiary A |
| 13 | Nursing management | 45 | Master | 25 | Senior | Tertiary A |
| 14 | Clinical medicine | 54 | Master | 29 | Senior | Tertiary A |
| 15 | Omaha System research expert | 45 | Master | 22 | Senior | Tertiary A |

**Supplementary Table 2.** Summary of Expert Consultation Opinions on the Nursing Problem Assessment Tool (Two Rounds)

| **Expert Consultation** | **Decisions** |
| --- | --- |
| Tertiary indicators |  |
| Suggested deletion of “Other” under the secondary indicator *Income* | Indicator deleted (Variation coefficient > 0.25) |
| Suggested deletion of “Insufficient exercise space” under *Neighborhood/Workplace Safety* | Indicator deleted (Variation coefficient > 0.25) |
| Suggested deletion of “Insufficient health-promoting resources” under *Neighborhood/Workplace Safety* | Indicator deleted (Variation coefficient > 0.25) |
| Suggested deletion of “Other” under *Neighborhood/Workplace Safety* | Indicator deleted (Variation coefficient > 0.25) |
| Suggested deletion of “Impaired judgment” under *Cognition* | Indicator deleted (Variation coefficient > 0.25) |
| Suggested deletion of “Impaired recall of recent events” under *Cognition* | Indicator deleted (Variation coefficient > 0.25) |
| Suggested deletion of “Impaired recall of remote events” under *Cognition* | Indicator deleted (Variation coefficient > 0.25) |
| Suggested deletion of “Impaired calculation and sequencing skills” under *Cognition* | Indicator deleted (Variation coefficient > 0.25) |
| Suggested deletion of “Impaired concentration” under *Cognition* | Indicator deleted (Variation coefficient > 0.25) |
| Suggested deletion of “Impulsivity” under *Cognition* | Indicator deleted (Variation coefficient > 0.25) |
| Suggested deletion of “Other” under *Cognition* | Indicator deleted (Variation coefficient > 0.25) |
| Suggested deletion of “Excessive oiliness” under *Skin* | Indicator deleted (Variation coefficient > 0.25) |
| Suggested deletion of “Abnormal breath sounds” under *Respiration* | Indicator deleted (Variation coefficient > 0.25) |
| Suggested deletion of “Decreased pulse rate” under *Circulation* | Indicator deleted (Variation coefficient > 0.25) |
| Suggested deletion of “Pulse deficit” under *Circulation* | Indicator deleted (Variation coefficient > 0.25) |
| Suggested deletion of “Angina pectoris” under *Circulation* | Indicator deleted (Variation coefficient > 0.25) |
| Suggested deletion of “Abuse of over-the-counter/prescription drugs” under *Substance Use* | Indicator deleted (Variation coefficient > 0.25) |
| Suggested deletion of “Exposure to cigarette smoke” under *Substance Use* | Indicator deleted (Variation coefficient > 0.25) |
| Suggested deletion of “Insufficient sources of healthcare” under *Health Care Supervision* | Indicator deleted (Variation coefficient > 0.25) |
| Suggested addition of “Acid-base imbalance” under *Digestion-Hydration* | Indicator added |
| Suggested deletion of “Loss of appetite” under *Digestion–Hydration* | Retained after consideration of clinical relevance |
| Suggested deletion of “Difficulty with mobility” under *Neuromuscular–Skeletal Function* | Retained after consideration of clinical relevance |
| Suggested addition of “Lack of knowledge of one’s medication regimen” under *Medication Regimen* | Indicator added |
| Suggested addition of “Lack of knowledge of medication effects and adverse reactions” under *Medication Regimen* | Indicator added |
| Suggested addition of “Complete inability to perform activities of daily living” under *Personal Care* | Indicator added |
| Suggested addition of “Partial inability to perform activities of daily living” under *Personal Care* | Indicator added |
| Suggested addition of “Unwillingness to perform personal care activities” under *Personal Care* | Indicator added |
| Suggested addition of “Other” under *Personal Care* | Indicator added |
| Suggested addition of “Lack of social support (e.g., workload adjustment)” under *Neglect* | Indicator added |
| Suggested revision of “Low/no income” to “No income” under *Income* | Indicator revised |
| Suggested revision of “No medical insurance” to “Unable to afford medical expenses” under *Income* | Indicator revised |
| Suggested reassignment of “Somatic fatigue” from *Mental Health* to *Circulation* | Indicator revised |
| Suggested revision of “Reported pain” to “Angina pectoris” under *Pain* | Indicator revised |
| Suggested revision of “Changes in vital signs” to “Pain-induced vital sign changes” under *Pain* | Indicator revised |
| Suggested revision of “Passive positioning” to “Pain-induced passive positioning” under *Pain* | Indicator revised |
| Suggested revision of “Restless behavior” to “Pain-induced restless behavior” under *Pain* | Indicator revised |
| Suggested revision of “Distressed facial expression” to “Pain-induced distressed facial expression” under *Pain* | Indicator revised |
| Suggested revision of “Pallor/diaphoresis” to “Pain-induced pallor/diaphoresis” under *Pain* | Indicator revised |
